# Supplementary material for: Metabolome and molecular basis for carbohydrate increase and nitrate reduction in burley tobacco seedlings by glycerol through upregulating carbon and nitrogen metabolism
Source: PubMed Central journal article supplement (PMC6125293; doi:10.1038/s41598-018-31432-3), 2018-09-05
Supplement: 41598_2018_31432_MOESM1_ESM.pdf [file 41598_2018_31432_MOESM1_ESM.pdf]

**Metabolome and molecular basis for carbohydrate increase  
and nitrate reduction in burley tobacco seedlings by glycerol  
through upregulating carbon and nitrogen metabolism**

Yafei Li <sup>1 †</sup>, Dong Chang <sup>1,2 †</sup>, Huijuan Yang <sup>1</sup>, Jing Wang <sup>1</sup>, Hongzhi Shi <sup>1 \*</sup>  
1 National Tobacco Cultivation & Physiology & Biochemistry Research Center, Henan  
Agricultural University, 450002, Zhengzhou, China; 2 Pingdingshan Branch of Henan  
Provincial Tobacco Company, Pingdingshan, 467002, Pingdingshan, China

**\*Corresponding author:** Hongzhi Shi: [shihongzhi88@163.com](mailto:shihongzhi88@163.com); Tel: +86-136-1383-  
0281

**Author information:**

Yafei Li: [liyafei@henau.edu.cn](mailto:liyafei@henau.edu.cn)

Dong Chang: [cd411@outlook.com](mailto:cd411@outlook.com)

Huijuan Yang: [huijuan@zju.edu.cn](mailto:huijuan@zju.edu.cn)

Jing Wang: [wj2009g@163.com](mailto:wj2009g@163.com)

† These authors contributed equally to this work.

**Supporting Table S1. The primers used for qRT-PCR in Experiment 1**

| <b>No.</b> | <b>Gene Symbol</b> | <b>Forward primer</b> | <b>Reverse primer</b>    | <b>Product length(bp)</b> | <b>Ta(°C)</b> |
|------------|--------------------|-----------------------|--------------------------|---------------------------|---------------|
| 1          | WRKY70             | TGCGAAGCAAACAAACAAGT  | ATGTGTGATGACCATAGTACG    | 79                        | 60            |
| 2          | TIFY10A            | AGAATTACTTCAACTGCACCA | CTAATCCAAGCCATGCCTTAT    | 88                        | 60            |
| 3          | EXO                | CATTCCACCAGCCCATTAC   | CATACCATCAACACCCACAT     | 77                        | 60            |
| 4          | XTH22              | GATGATTGGGCTACAAGAGG  | GCACTAAAGGGTGCTTTACT     | 62                        | 60            |
| 5          | MYB44              | GCGGAGGTGAGGAACTAT    | TTGCTGAAACTGCTGTTGTC     | 96                        | 60            |
| 6          | PGK                | AAGCCACTTGTACCAAGAC   | CCTCCTTCTGGTATTTCCGG     | 110                       | 60            |
| 7          | PPC16              | ATGTCCTTGATGCCATTACC  | GTTCCCTCAGACCACTCTCG     | 63                        | 60            |
| 8          | EGY1               | TGCTACCAGTTGGATGTCTTG | AAGCCCAGAAGTGTGTATG      | 103                       | 60            |
| 9          | L25                | CCCCTCACCACAGAGTCTGC  | AAGGGTGTTGTTGTCCTCAATCTT | 51                        | 60            |

**Supporting Table S2. The primers used for qRT-PCR in Experiment 2**

| No. | Gene Symbol | Forward primer        | Reverse primer           | Product length(bp) | Ta(°C) |
|-----|-------------|-----------------------|--------------------------|--------------------|--------|
| 1   | PGK         | AAGCCACTTGTACCAAGAC   | CCTCCTTCTGGTATTTTCGG     | 110                | 60     |
| 2   | GLPK        | TGTTTCAGTGGCTTAGGGACA | GATGCCAACTCCTCGATTTC     | 66                 | 60     |
| 3   | NIA1        | TTAGGGTCATTTCTCGACGTG | GAAATTGCCCTTTCCTGGTA     | 66                 | 60     |
| 4   | SPS         | TCCATTGAGAGAGCTTGCTAA | AGGAGGACTGATGAATTTGTG    | 90                 | 60     |
| 5   | SUS2-2      | TGAGATGCTCAAGCGCATA   | CAGGCAGCAACCGAGTAA       | 77                 | 60     |
| 6   | NPF3.1      | AGAACAGAGAGTTGGATGCTA | TGTCATCACCATCAACGACC     | 105                | 60     |
| 7   | NLP7        | GCTCAGACATGGCTACCT    | AGCTCTGAACTCATAGCCT      | 105                | 60     |
| 8   | gpmA        | TATCTTCACAAGCCCATCCT  | ATCCAGAGTTACCATTACTCG    | 117                | 60     |
| 9   | NPF7.3      | CTCTTTGTTGAGCAAGGTGA  | ATATGACGCCTGCTACACTAA    | 106                | 60     |
| 10  | PPC16       | ATGCCTTGATGCCATTACC   | GTCCTCAGACCACTCTCG       | 63                 | 60     |
| 11  | EGY1        | TGCTACCAGTTGGATGTCTTG | AAGCCCAGAAGTGTGTATG      | 103                | 60     |
| 12  | CP12-2      | GATGTGGTTGAAGAGGCG    | CAGTCTCAGGATTATCCTTGC    | 103                | 60     |
| 13  | L25         | CCCCTCACCACAGAGTCTGC  | AAGGGTGTTGTTGTCCTCAATCTT | 51                 | 60     |
